# Supplementary material for: A triphenylamine derivative and its Cd(ii) complex with high-contrast mechanochromic luminescence and vapochromism
Source: Royal Society of Chemistry journal article supplement (doi:10.1039/d1ce01319j), 2021-11-26
Supplement: d1ce01319j1.pdf [file d1ce01319j1.pdf]

## Supporting Information

### A triphenylamine derivative and its Cd(II) complex with high-contrast mechanochromic luminescence and vapochromism

Qiong-Fang Liang, Han-Wen Zheng, Dong-Dong Yang, Xiang-Jun Zheng\*

# Contents

|                                                                                                                                 |   |
|---------------------------------------------------------------------------------------------------------------------------------|---|
| <b>Figure S1</b> Molecular packing modes of <b>HL·2CH<sub>3</sub>CN</b> and complex <b>1</b> .....                              | 1 |
| <b>Figure S2</b> Fluorescence decay curves of <b>HL·2CH<sub>3</sub>CN</b> in different states.....                              | 2 |
| <b>Figure S3</b> Fluorescence decay curves of <b>1</b> in different states.....                                                 | 3 |
| <b>Figure S4</b> CIE diagrams of <b>HL·2CH<sub>3</sub>CN</b> and complex <b>1</b> with different treatments...                  | 3 |
| <b>Figure S5</b> TGA curves of <b>HL·2CH<sub>3</sub>CN</b> in different states.....                                             | 4 |
| <b>Figure S6</b> DSC curves of <b>HL·2CH<sub>3</sub>CN</b> and complex <b>1</b> in different states.....                        | 4 |
| <b>Figure S7</b> UV–Vis absorption spectra of <b>HL·2CH<sub>3</sub>CN</b> (a) and complex <b>1</b> (b) in different states..... | 4 |
| <b>Figure S8</b> XPS spectra of <b>HL·2CH<sub>3</sub>CN</b> and <b>HL-HCl</b> .....                                             | 5 |
| <b>Figure S9</b> XPS spectra of <b>1</b> and <b>1-HCl</b> .....                                                                 | 5 |
| <b>Table S1</b> Dihedral angles between different planes in <b>HL·2CH<sub>3</sub>CN</b> and complex <b>1</b> ....               | 6 |
| <b>Table S2</b> Crystal data and structure refinement parameters of <b>HL·2CH<sub>3</sub>CN</b> and complex <b>1</b> .....      | 6 |

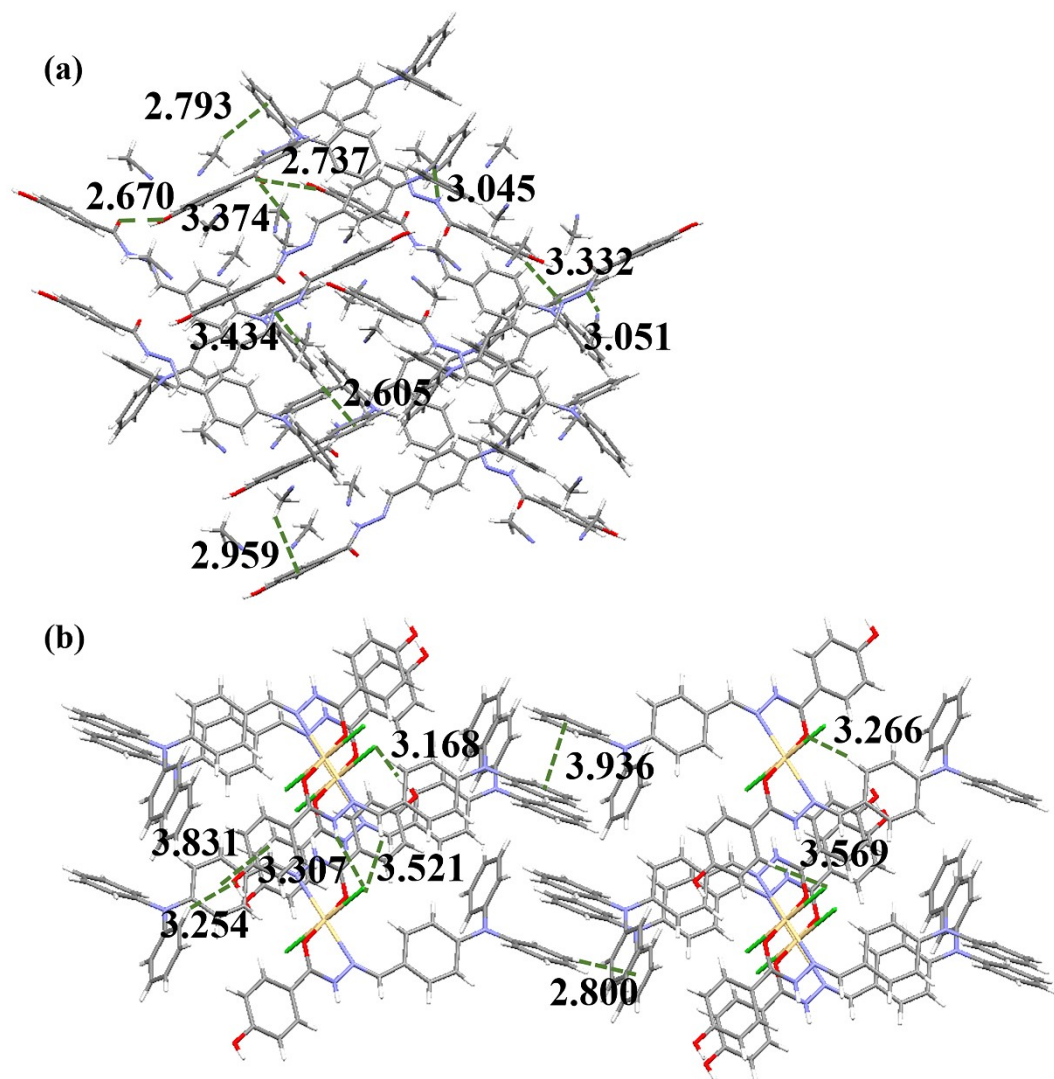

**Figure S1** Molecular packing modes of HL·2CH<sub>3</sub>CN and complex 1.

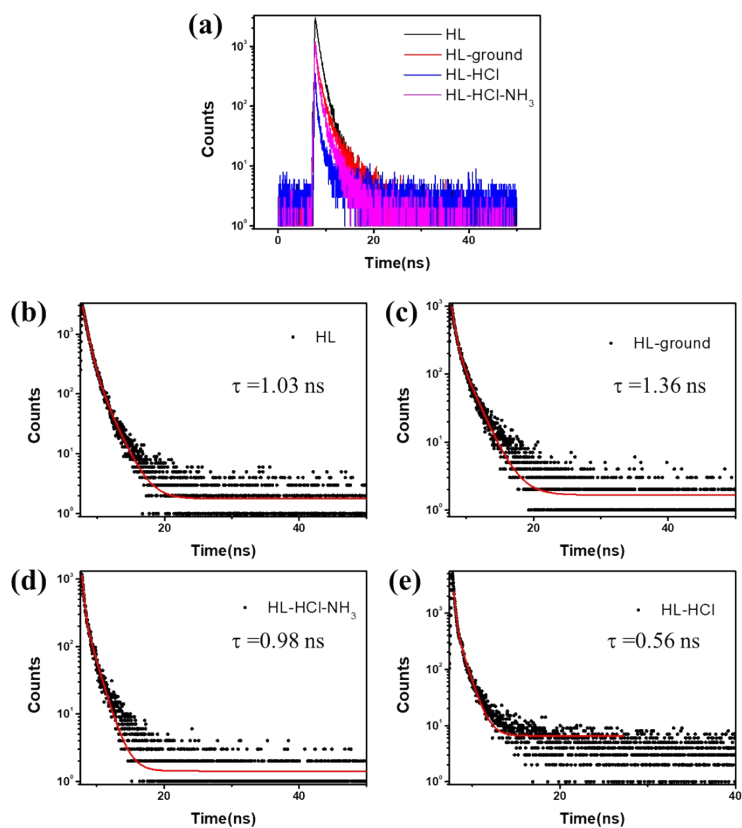

**Figure S2** Fluorescence decay curves (excited at 371.8 nm): (a) **HL**·2CH<sub>3</sub>CN in different states, (b) Fit results of original sample monitored at 464 nm, (c) Fit results of ground sample of **HL**·2CH<sub>3</sub>CN monitored at 520 nm, (d) Fit results of **HL-HCl** monitored at 594 nm, (e) Fit results of **HL-HCl-NH<sub>3</sub>** monitored at 494 nm.

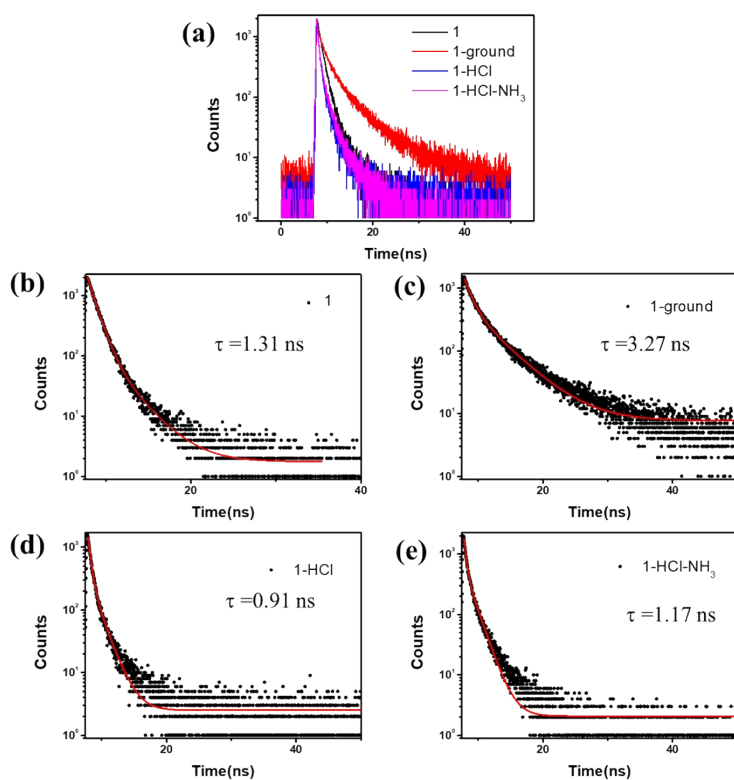

**Figure S3** Fluorescence decay curves (excited at 371.8 nm): (a) **1** in different states, (b) Fit results of original sample monitored at 490 nm, (c) Fit results of ground sample of **1** monitored at 572 nm, (d) Fit results of **1-HCl** monitored at 587 nm, (e) Fit results of **1-HCl-NH<sub>3</sub>** monitored at 503 nm.

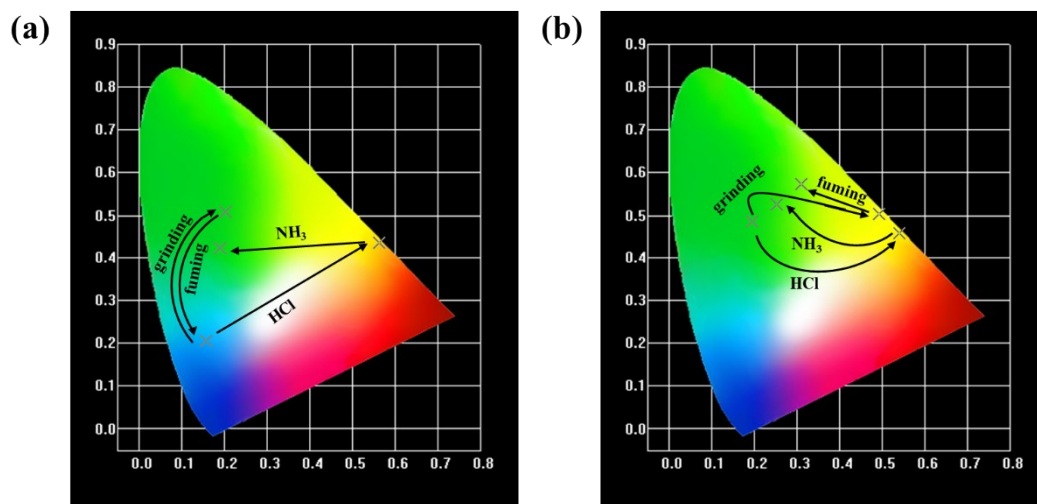

**Figure S4** CIE diagrams of **HL·2CH<sub>3</sub>CN** and complex **1** with different treatments.

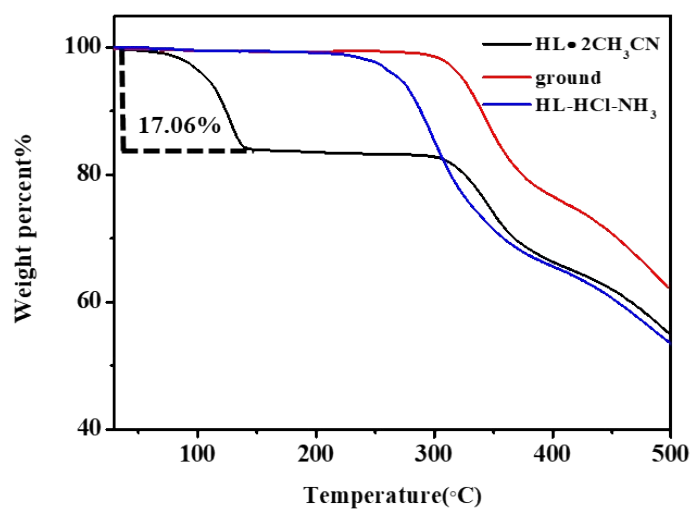

**Figure S5** TGA curves of **HL·2CH<sub>3</sub>CN** in different states.

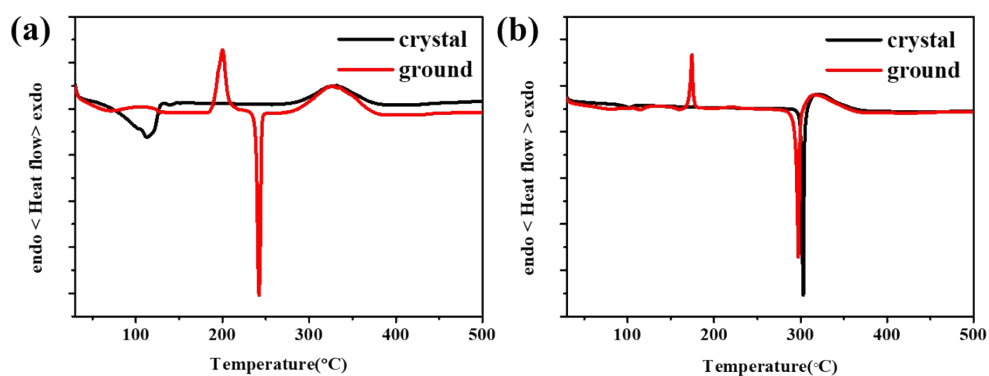

**Figure S6** DSC curves of **HL·2CH<sub>3</sub>CN** (a) and complex **1** (b) in different states.

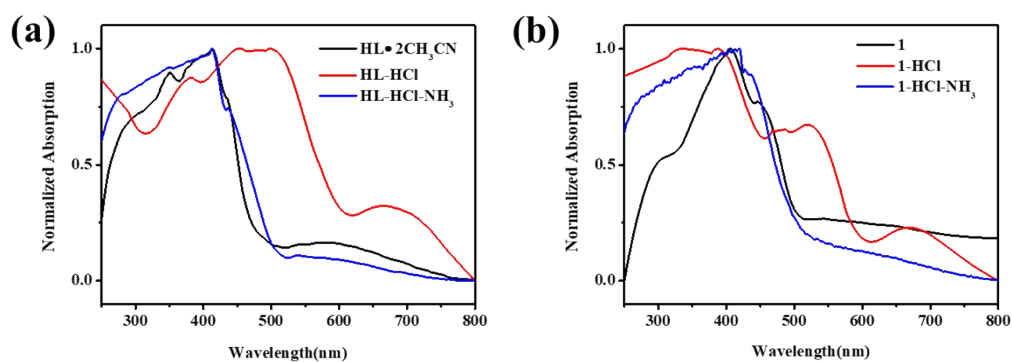

**Figure S7** UV-Vis absorption spectra of **HL·2CH<sub>3</sub>CN** (a) and complex **1** (b) in different states.

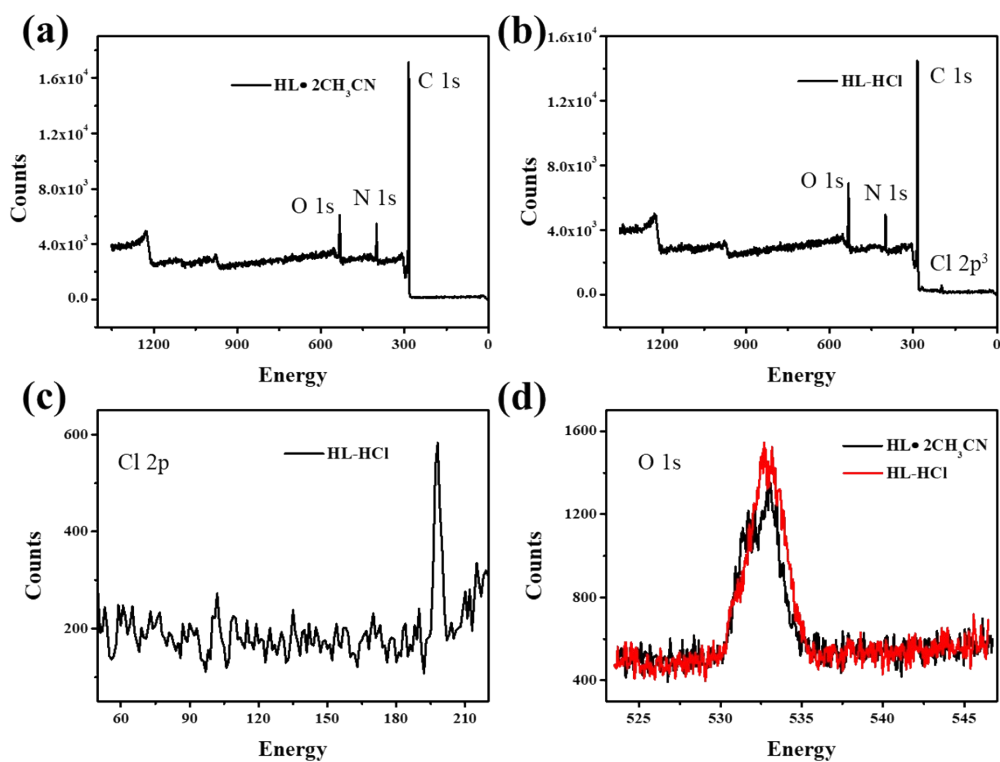

**Figure S8** XPS spectra of **HL·2CH<sub>3</sub>CN** and **HL-HCl**.

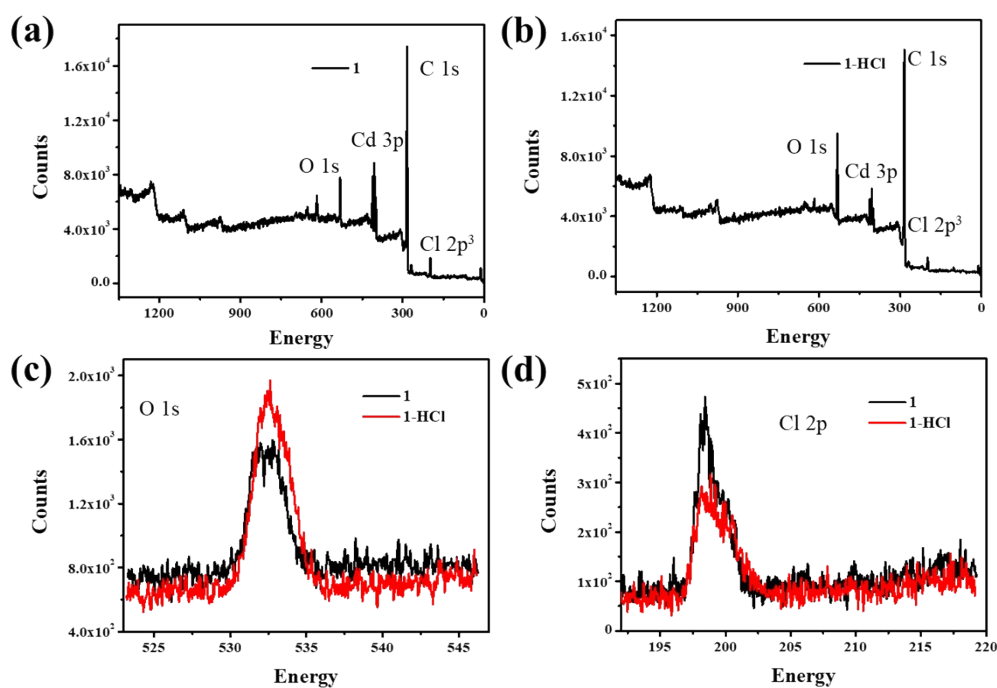

**Figure S9** XPS spectra of complex **1** and **1-HCl**.

**Table S1** Dihedral angles between different planes in **HL·2CH<sub>3</sub>CN** and complex **1**.

|  | A/B | B/C | B/D | C/D |
|--|-----|-----|-----|-----|
|--|-----|-----|-----|-----|

|                            |                 |       |       |       |       |
|----------------------------|-----------------|-------|-------|-------|-------|
| <b>HL·2CH<sub>3</sub>C</b> | O1-containing L | 48.76 | 70.17 | 64.92 | 76.75 |
| <b>N</b>                   | O3-containing L | 47.10 | 71.03 | 55.92 | 80.41 |
| <b>Complex 1</b>           |                 | 12.05 | 79.76 | 60.49 | 83.40 |

**Table S2** Crystal data and structure refinement parameters of **HL·2CH<sub>3</sub>CN** and complex **1**.

| Compound                                      | <b>HL·2CH<sub>3</sub>CN</b>                                    | <b>Complex 1</b>                                                                  |
|-----------------------------------------------|----------------------------------------------------------------|-----------------------------------------------------------------------------------|
| Empirical formula                             | C <sub>60</sub> H <sub>54</sub> N <sub>10</sub> O <sub>4</sub> | C <sub>26</sub> H <sub>21</sub> Cd <sub>0.5</sub> ClN <sub>3</sub> O <sub>2</sub> |
| Formula weight                                | 975.10                                                         | 499.11                                                                            |
| Temperature/K                                 | 99.99(10)                                                      | 100.00(1)                                                                         |
| Crystal system                                | triclinic                                                      | triclinic                                                                         |
| Space group                                   | P-1                                                            | P-1                                                                               |
| a/Å                                           | 11.5136(5)                                                     | 7.2058(2)                                                                         |
| b/Å                                           | 14.4562(5)                                                     | 7.7740(3)                                                                         |
| c/Å                                           | 16.3680(6)                                                     | 20.4876(7)                                                                        |
| α/°                                           | 75.824(3)                                                      | 86.501(3)                                                                         |
| β/°                                           | 85.556(3)                                                      | 89.897(3)                                                                         |
| γ/°                                           | 89.480(3)                                                      | 83.117(3)                                                                         |
| Volume/Å <sup>3</sup>                         | 2633.30(18)                                                    | 1137.27(7)                                                                        |
| Z                                             | 2                                                              | 2                                                                                 |
| ρ <sub>calc</sub> (g cm <sup>-3</sup> )       | 1.230                                                          | 1.458                                                                             |
| μ/mm <sub>-1</sub>                            | 0.636                                                          | 5.358                                                                             |
| F(000)                                        | 1024.0                                                         | 510.0                                                                             |
| Radiation                                     | CuKα (λ = 1.54184)                                             | CuKα (λ = 1.54184)                                                                |
| 2θ range for data collection/°                | 7.33 to 155.736                                                | 8.648 to 153.166                                                                  |
| Index ranges                                  | -14 ≤ h ≤ 11, -18 ≤ k ≤ 18, -20 ≤ l ≤ 20                       | -28 ≤ h ≤ 8, -9 ≤ k ≤ 9, -25 ≤ l ≤ 25                                             |
| Reflections collected                         | 32913                                                          | 11748                                                                             |
| R <sub>int</sub> /R <sub>sigma</sub>          | 0.0666/0.0553                                                  | 0.0738/0.0623                                                                     |
| Data/restraints/parameters                    | 10507/0/673                                                    | 4460/6/297                                                                        |
| Goodness-of-fit on F <sup>2</sup>             | 1.249                                                          | 1.158                                                                             |
| Final R indexes [ <i>I</i> ≥ 2σ ( <i>I</i> )] | R <sub>1</sub> = 0.0727, wR <sub>2</sub> = 0.1925              | R <sub>1</sub> = 0.0481, wR <sub>2</sub> = 0.1288                                 |
| Final R indexes [all data]                    | R <sub>1</sub> = 0.0949, wR <sub>2</sub> = 0.2034              | R <sub>1</sub> = 0.0551, wR <sub>2</sub> = 0.1306                                 |
| Largest diff. peak/hole / e Å <sup>-3</sup>   | 0.49/-0.29                                                     | 0.93/-1.21                                                                        |
| CCDC number                                   | 2099606                                                        | 2099607                                                                           |
